# Supplementary material
Source: PubMed Central journal article supplement (PMC3065997)
Supplement: NIHMS276386-supplement-1.pdf [file NIHMS276386-supplement-1.pdf]

## ONLINE SUPPLEMENT

### TRAJECTORIES OF DEPRESSIVE EPISODES AND HYPERTENSION OVER 24 YEARS: THE WHITEHALL II PROSPECTIVE COHORT STUDY

Hermann Nabi, PhD\*<sup>1,2</sup>  
Jean-François Chastang, PhD<sup>1,2</sup>  
Thomas Lefèvre, M.Ing.<sup>3,4</sup>  
Aline Dugravot, Msc<sup>1,2</sup>  
Maria Melchior, ScD<sup>1,2</sup>  
Michael G. Marmot PhD, FFPHM, FRCP<sup>5</sup>  
Martin J. Shipley, Msc<sup>5</sup>  
Mika Kivimäki PhD<sup>5</sup>  
Archana Singh-Manoux, PhD<sup>1,2,5,6</sup>

1. INSERM, U1018, Centre for Research in Epidemiology and Population Health, Epidemiology of occupational and social determinants of health, F-94807, Villejuif, France
2. Université de Versailles St Quentin, UMRS 1018, F-94807, Villejuif, France
3. LaTIM, Laboratory of Medical Information Processing / INSERM U650 / IFR 148, Brest, France
4. Faculty of Medicine Paris 12, AP-HP, France
5. Department of Epidemiology and Public Health, University College London, United Kingdom
6. Hôpital Ste Péline, AP-HP, Centre de Gérontologie, Paris, F-75781, France

**Running/short title:** depression and hypertension over time

\*Corresponding Author: Dr Hermann Nabi  
Centre for Research in Epidemiology and Population Health /U1018  
Hôpital Paul Brousse  
Bâtiment 15/16  
16 avenue Paul Vaillant Couturier  
94807 Villejuif Cedex  
Telephone: +33(0)1 77 74 74 21, Fax: +33(0)177 74 74 03 ([Hermann.Nabi@inserm.fr](mailto:Hermann.Nabi@inserm.fr))

**Appendix 1: Description of the method to identify trajectories of depressive episodes overtime.**

Because “complete case” analysis, particularly in long-term follow-up studies, is generally based on an increasingly healthy group, it might bias parameter estimates. Thus, we decided to include all participants with at least two measurements on depressive episode in the trajectories analysis. A total of 6,889 men and 3,413 women were therefore included in the analysis modeling the trajectories of depressive episodes over time. We identified distinct trajectories that best described the data using Bayesian Information Criterion (BIC), a measure of goodness of fit (less negative indicates a better fit) <sup>29</sup>. We accomplished this analysis by increasing the number of different trajectories as long as the BIC increased. The BIC was -16332.93 for 1 trajectory model, -14994.11 for a 2 trajectories model, -14993.06 for a 3 trajectories model, -14983.01 for a 4 trajectories model, and -14998.97 for a 5 trajectories model. Based on these values, the 4-trajectory model would have the best fit to describe depressive episodes trajectories over time. The 4 groups were composed of 74%, 19%, 2%, 5% of the study population; due to small number in the last 2 groups, this model could not be used in further analyses. As the fit improved only marginally after the 2-trajectories model, we chose to perform further analyses based on that model - a decision that can also be justified in terms of parsimony.

**Table S1. Associations between baseline covariates, their interactions with age and hypertension over time (n observations = 40599)**

| Variables            | Model 1                            |                                      | Model 2 ¶                                    |
|----------------------|------------------------------------|--------------------------------------|----------------------------------------------|
|                      | Main effect<br>Odds ratio (95% CI) | Main effect #<br>Odds ratio (95% CI) | Interaction effect **<br>Odds ratio (95% CI) |
| Age (time variable)* |                                    | 1.36 (1.34, 1.38) §                  |                                              |
| Sex                  |                                    |                                      |                                              |
| Women                |                                    | 0.58 (0.51, 0.67) §                  | 1.09 (1.06, 1.12) §                          |
| Men                  |                                    | 1                                    | 1                                            |
| Ethnicity            |                                    |                                      |                                              |
| White                | 1                                  | 1                                    | 1                                            |
| Other                | 1.60 (1.44, 1.78) §                | 1.35 (1.10, 1.66) ‡                  | 1.04 (1.00, 1.09)                            |
| Marital status       |                                    |                                      |                                              |
| Married/cohabiting   | 1                                  | 1                                    | 1                                            |
| Other                | 1.07 (0.99, 1.15)                  | 1.34 (1.15, 1.55) §                  | 0.95 (0.92, 0.98) §                          |
| Missing              | 0.92 (0.55, 1.55)                  | 1.52 (0.62, 3.69)                    | 0.89 (0.73, 1.09)                            |

|                        |                     |                     |                     |
|------------------------|---------------------|---------------------|---------------------|
| Socioeconomic status   |                     |                     |                     |
| High                   | 1                   | 1                   | 1                   |
| Intermediate           | 1.10 (1.02, 1.19) † | 1.09 (0.94, 1.28)   | 1.00 (0.97, 1.03)   |
| Low                    | 1.24 (1.11, 1.37) § | 1.50 (1.22, 1.83) § | 0.96 (0.92, 1.00) † |
| Physical activity      |                     |                     |                     |
| No                     | 1.07 (0.99, 1.15)   | 1.11 (0.96, 1.28)   | 0.99 (0.96, 1.02)   |
| Yes                    | 1                   | 1                   | 1                   |
| Missing                | 1.17 (1.01, 1.36) † | 1.19 (0.86, 1.64)   | 1.00 (0.93, 1.06)   |
| Smoking status         |                     |                     |                     |
| Never                  | 1                   | 1                   | 1                   |
| Ex                     | 0.99 (0.92, 1.07)   | 0.98 (0.85, 1.14)   | 1.00 (0.97, 1.03)   |
| Current                | 0.99 (0.91, 1.09)   | 0.77 (0.64, 0.93) ‡ | 1.06 (1.02, 1.10) ‡ |
| Missing                | 1.36 (0.95, 1.94)   | 2.06 (1.13, 3.75) † | 0.90 (0.79, 1.03)   |
| High alcohol intake    |                     |                     |                     |
| No                     | 1                   | 1                   | 1                   |
| Yes                    | 1.20 (1.10, 1.31) § | 1.24 (1.04, 1.47) † | 0.99 (0.96, 1.03)   |
| Missing                | 0.97 (0.67, 1.42)   | 1.30 (0.68, 2.48)   | 0.93 (0.80, 1.08)   |
| BMI                    |                     |                     |                     |
| <19.9                  | 1                   | 1                   | 1                   |
| 20-24.9                | 1.47 (1.24, 1.74) § | 1.19 (0.87, 1.65)   | 1.05 (0.98, 1.13)   |
| 25-29.9                | 2.61 (2.20, 3.10) § | 2.03 (1.47, 2.81) § | 1.06 (0.99, 1.14)   |
| >30                    | 4.67 (3.84, 5.69) § | 4.48 (3.07, 6.53) § | 1.01 (0.93, 1.09)   |
| Missing                | 2.85 (1.09, 7.45) † | 2.43 (0.17, 35.1)   | 1.04 (0.67, 1.61)   |
| Cholesterol total ≥5mg |                     |                     |                     |
| No                     | 1                   | 1                   | 1                   |
| Yes                    | 1.28 (1.17, 1.39) § | 1.32 (1.12, 1.55) § | 0.99 (0.96, 1.03)   |
| Missing                | 0.94 (0.62, 1.43)   | 0.50 (0.20, 1.29)   | 1.14 (0.94, 1.39)   |
| History of Diabetes    |                     |                     |                     |
| No                     | 1                   | 1                   | 1                   |
| Yes                    | 1.92 (1.45, 2.54) § | 1.16 (0.63, 2.14)   | 1.13 (0.97, 1.31)   |
| History of MI          |                     |                     |                     |
| No                     | 1                   | 1                   | 1                   |
| Yes                    | 1.98 (1.34, 2.92) § | 1.22 (0.40, 3.71)   | 1.11 (0.86, 1.44)   |
| History of stroke      |                     |                     |                     |
| No                     | 1                   | 1                   | 1                   |
| Yes                    | 3.25 (1.97, 5.37) § | 3.14 (0.94, 10.5)   | 1.01 (0.75, 1.35)   |
| History of cancer      |                     |                     |                     |
| No                     | 1                   | 1                   | 1                   |
| Yes                    | 0.82 (0.60, 1.11)   | 0.37 (0.18, 0.78) ‡ | 1.17 (1.02, 1.35) † |

\* Each five years increase

† p <0.05; ‡ p <0.01; § p <0.001

|| Model 1 shows only the main effect of each variable adjusted for age, sex, and interaction between age and sex.

¶ Model 2 shows main effects together with their interactions with age.

# shows the main effect of each variable for age group 35-39 (reference) and is based on all 40 599 observations.

\*\* shows the proportional change in the main effect of each variable associated with each 5-year increase in age.

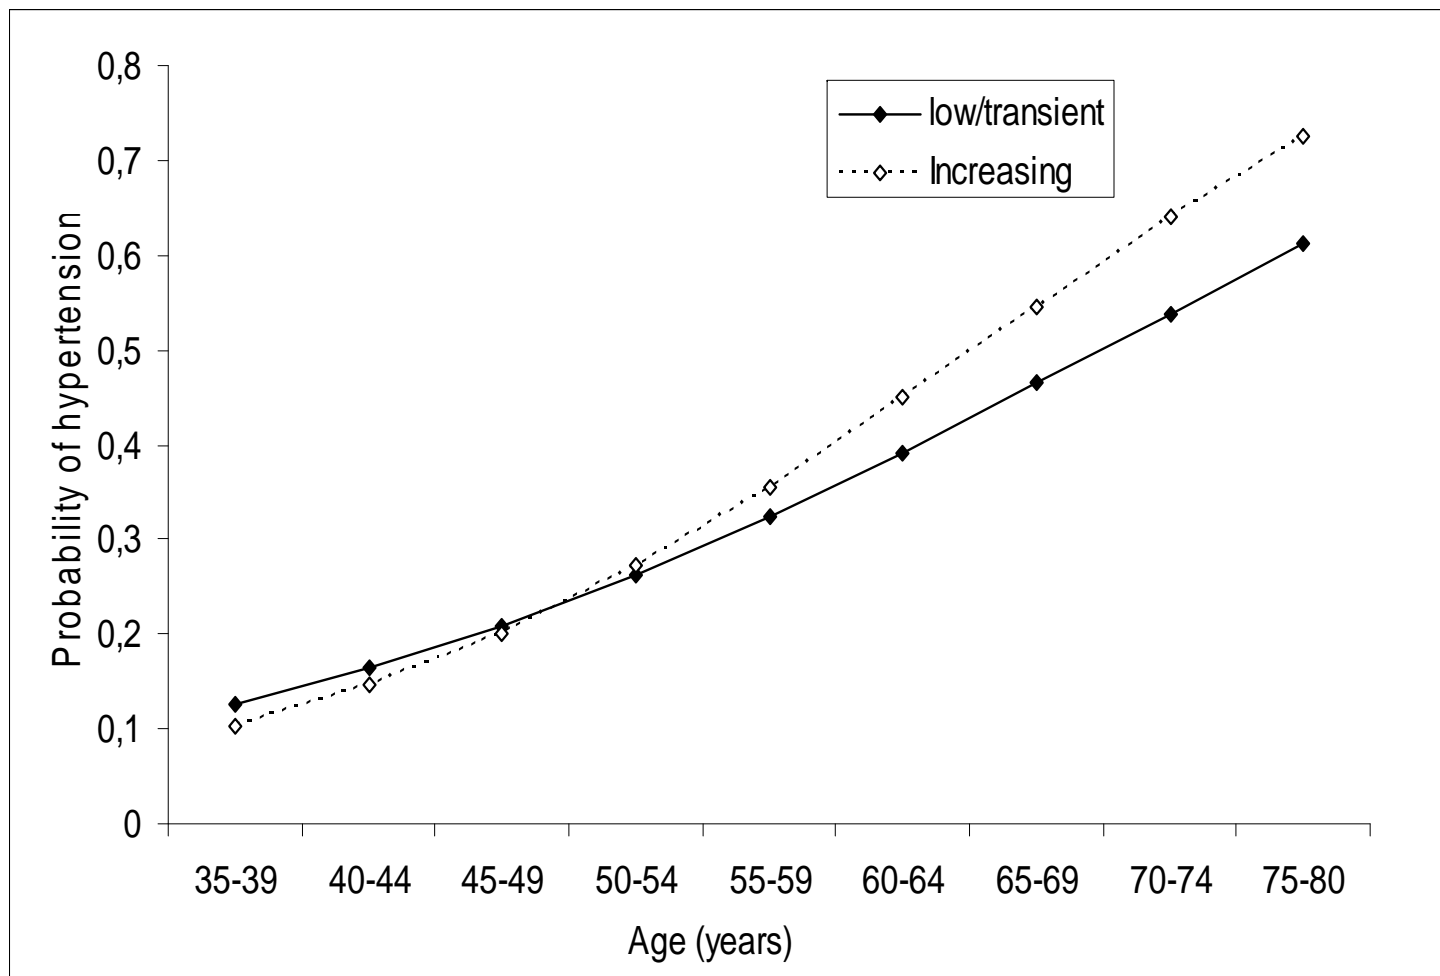

**Figure S1:** Probability of hypertension associated with depressive trajectories in men. The age range at the study baseline (phase 1) was 35 to 55 years and 55-80 at the follow-up (phase 9). The probabilities were calculated from models that include age, depressive trajectories group and interaction between depressive trajectories groups and age.

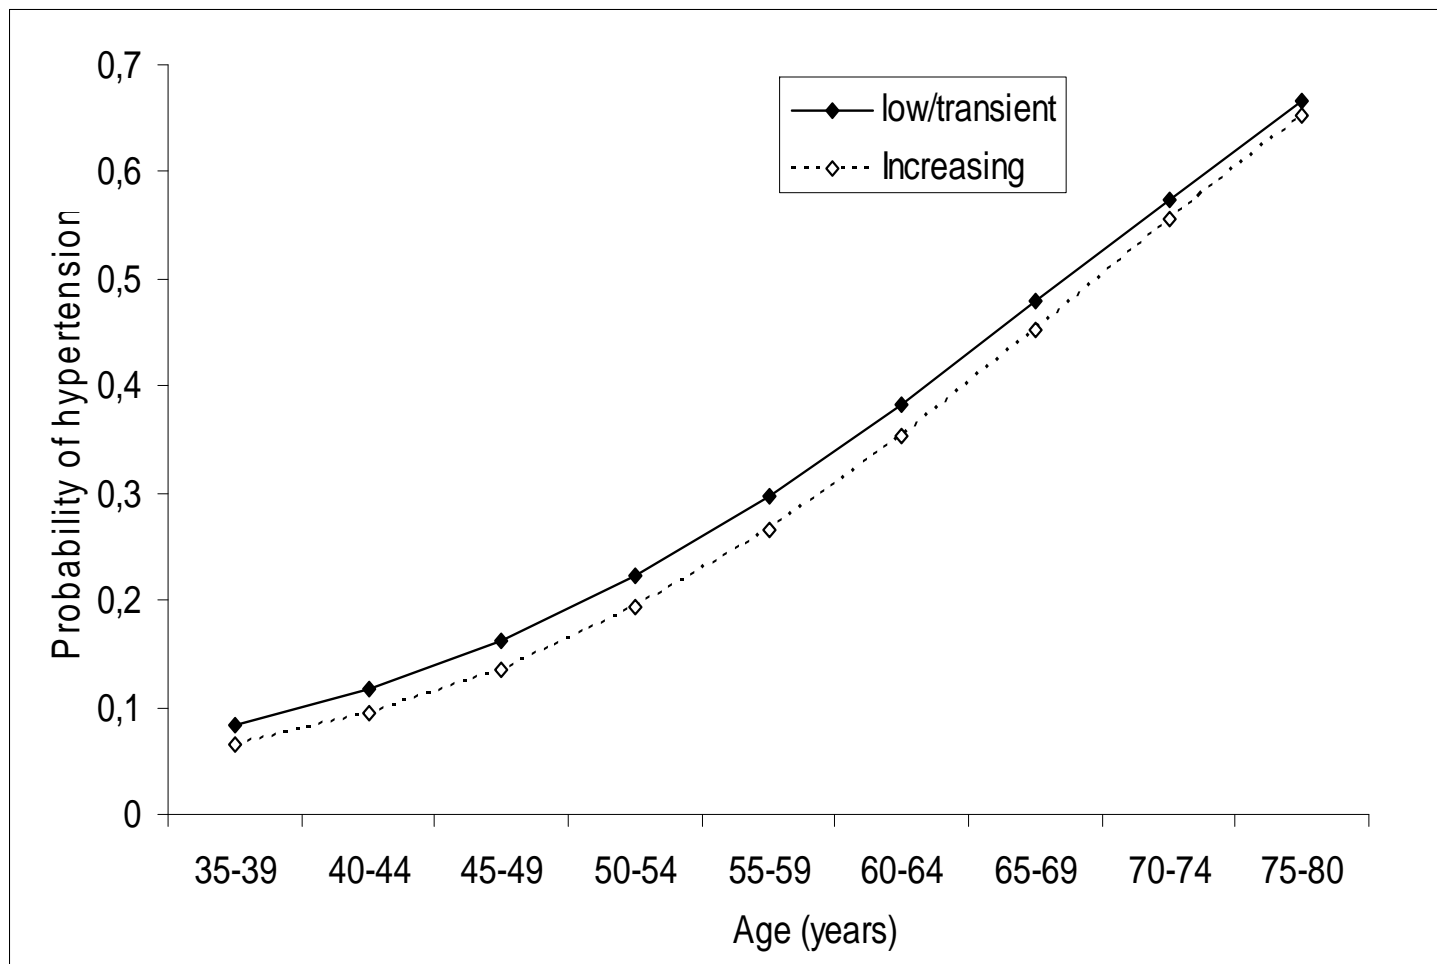

**Figure S2:** Probability of hypertension associated with depressive trajectories in women. The age range at the study baseline (phase 1) was 35 to 55 years and 55-80 at the follow-up (phase 9). The probabilities were calculated from models that include age, depressive trajectories group and interaction between depressive trajectories groups and age
